# Supplementary material
Source: Royal Society of Chemistry journal article supplement (doi:10.1039/d6tc00954a)
Supplement: d6tc00954a1.pdf [file d6tc00954a1.pdf]

## Supporting information

### **Ionic Liquid Bridging Buried Interface for High-Performance Flexible Self-Powered Perovskite Nanowire Photodetectors with Excellent Mechanical Stability**

Ronghuan Liu<sup>a,c,†</sup>, Bihua Hu<sup>b,†</sup>, Dingjun Wu<sup>c,\*</sup>, Weican Hu<sup>c</sup>, Shiyu Chen<sup>c</sup>, Zi-Wei Zheng<sup>a,\*</sup>, Hai Zhou<sup>c,\*</sup>

<sup>a</sup> Digital Industry Research Institute, Zhejiang Wanli University, No.8 South Qian Hu Road, Ningbo 315100, Zhejiang, PR China

<sup>b</sup> Ningbo Key Laboratory of High Energy Density Battery, Institute of Carbon Neutrality, Zhejiang Wanli University, Ningbo 315100, Zhejiang, PR China

<sup>c</sup> School of Integrated Circuits (International School of Microelectronics), Dongguan University of Technology, Dongguan 523808, Guangdong, PR China

† These authors contributed equally to this work.

\* Corresponding author.

E-mail address: wudingj@dgut.edu.cn

E-mail address: zhengziwei@tsinghua.org.cn

E-mail address: hizhou@dgut.edu.cn

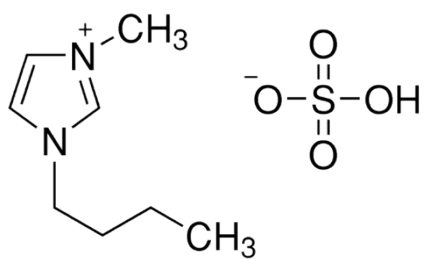

Figure S1. The molecular structure of ionic liquid BMIMHSO<sub>4</sub>.

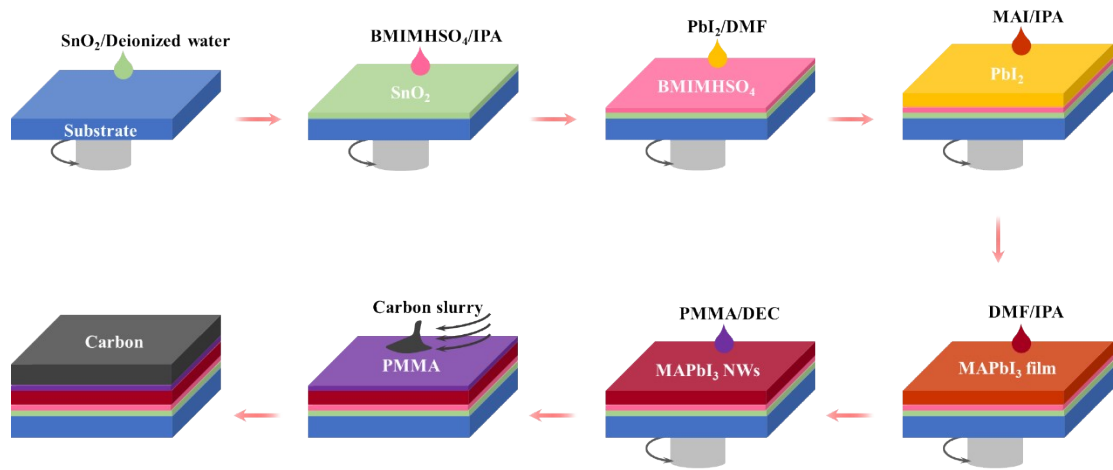

Figure S2. The preparation flow chart of the device with BMIMHSO<sub>4</sub> bridging the buried interface.

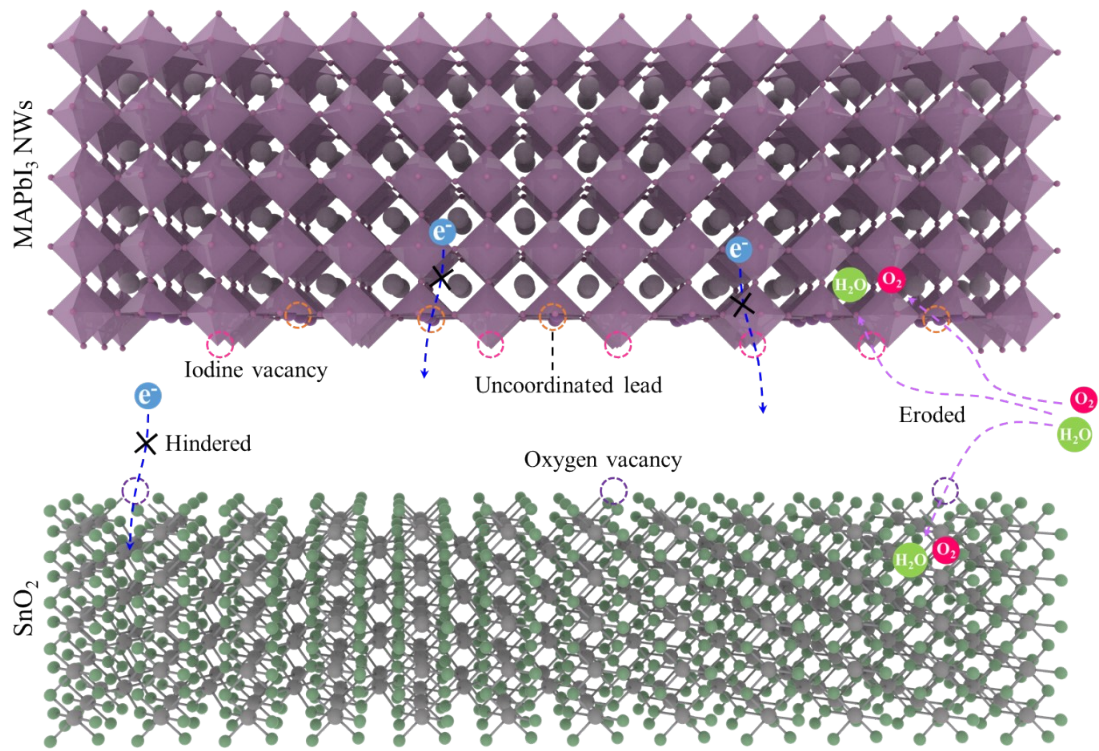

Figure 3. Schematic illustration of the buried interface defects between SnO<sub>2</sub> and MAPbI<sub>3</sub> NWs affecting the device performance and stability.

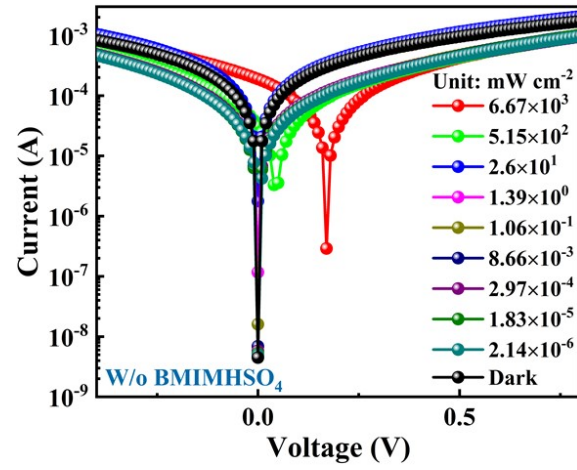

Figure S4. I-V curves of the rigid device without BMIMHSO<sub>4</sub> bridging buried interface under different light intensities.

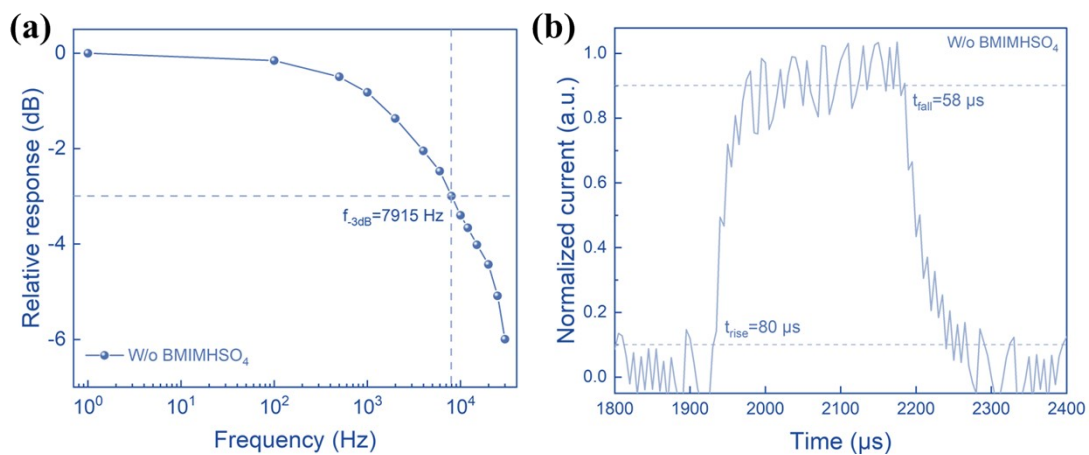

Figure S5. (a) -3 dB cut off frequency and (b) Response time of the rigid device without BMIMHS<sub>4</sub> bridging buried interface.

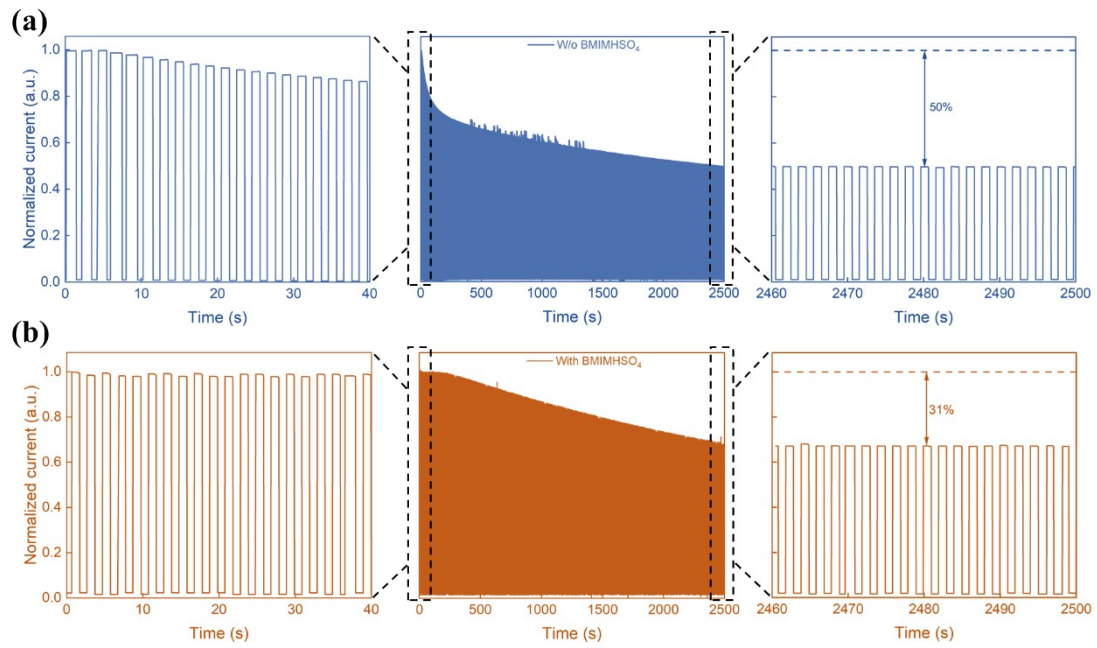

Figure S6. Normalized I-t curve of the rigid device (a) without and (b) with BMIMHS<sub>4</sub> bridging buried interface under continuous illumination for 2500 s.

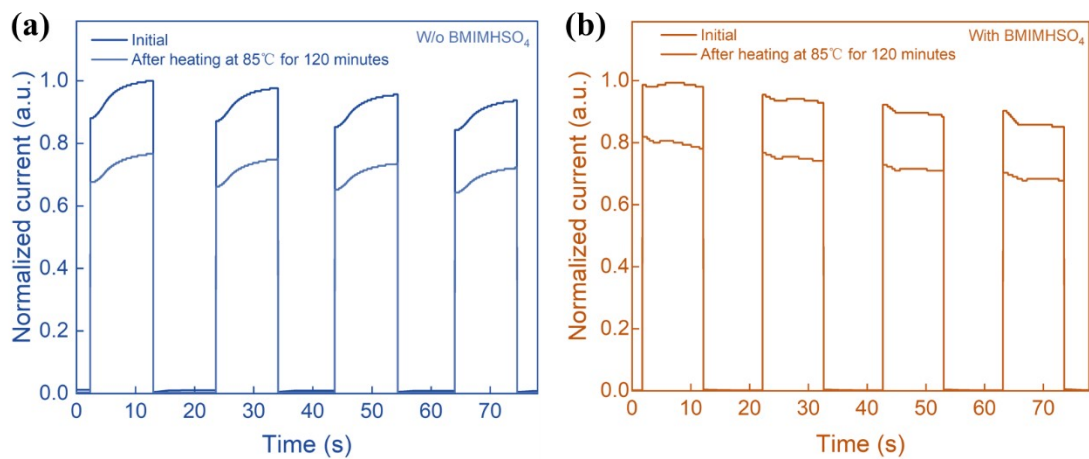

Figure S7. Normalized I-t curve of the rigid device (a) without and (b) with BMIMHSO<sub>4</sub> bridging buried interface before and after heating at 85°C for 120 minutes.

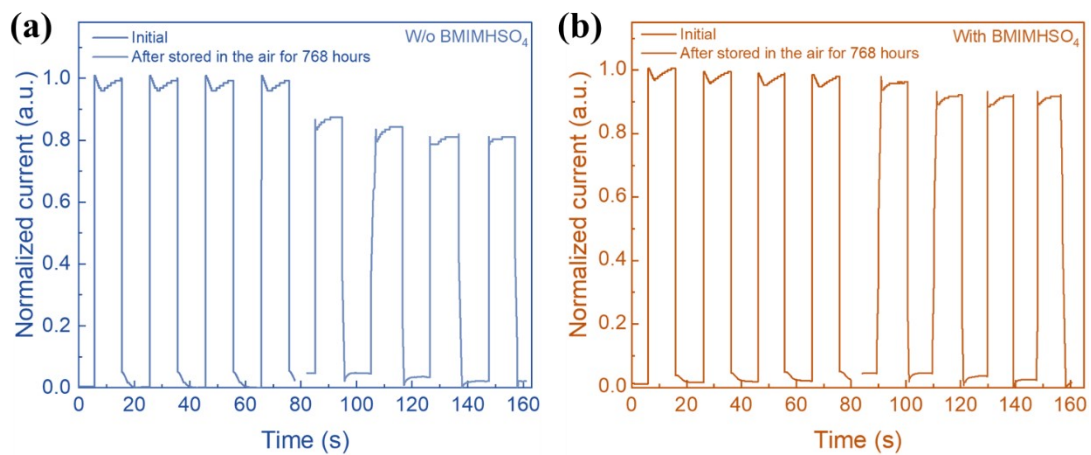

Figure S8. Normalized I-t curve of the rigid device (a) without and (b) with BMIMHSO<sub>4</sub> bridging buried interface before and after stored in the air (45%-80% humidity) for 768 hours.
